# Supplementary material for: Microplastic-mediated delivery of di-butyl phthalate alters C. elegans lifespan and reproductive fidelity
Source: Research Square preprint supplement (doi:10.21203/rs.3.rs-6629868/v1), 2025-05-21
Supplement: Supplementary file 1 [file 68a16b636b62937ca3d289d9.docx]

***Maldonado et al***

**Supplemental Figures**


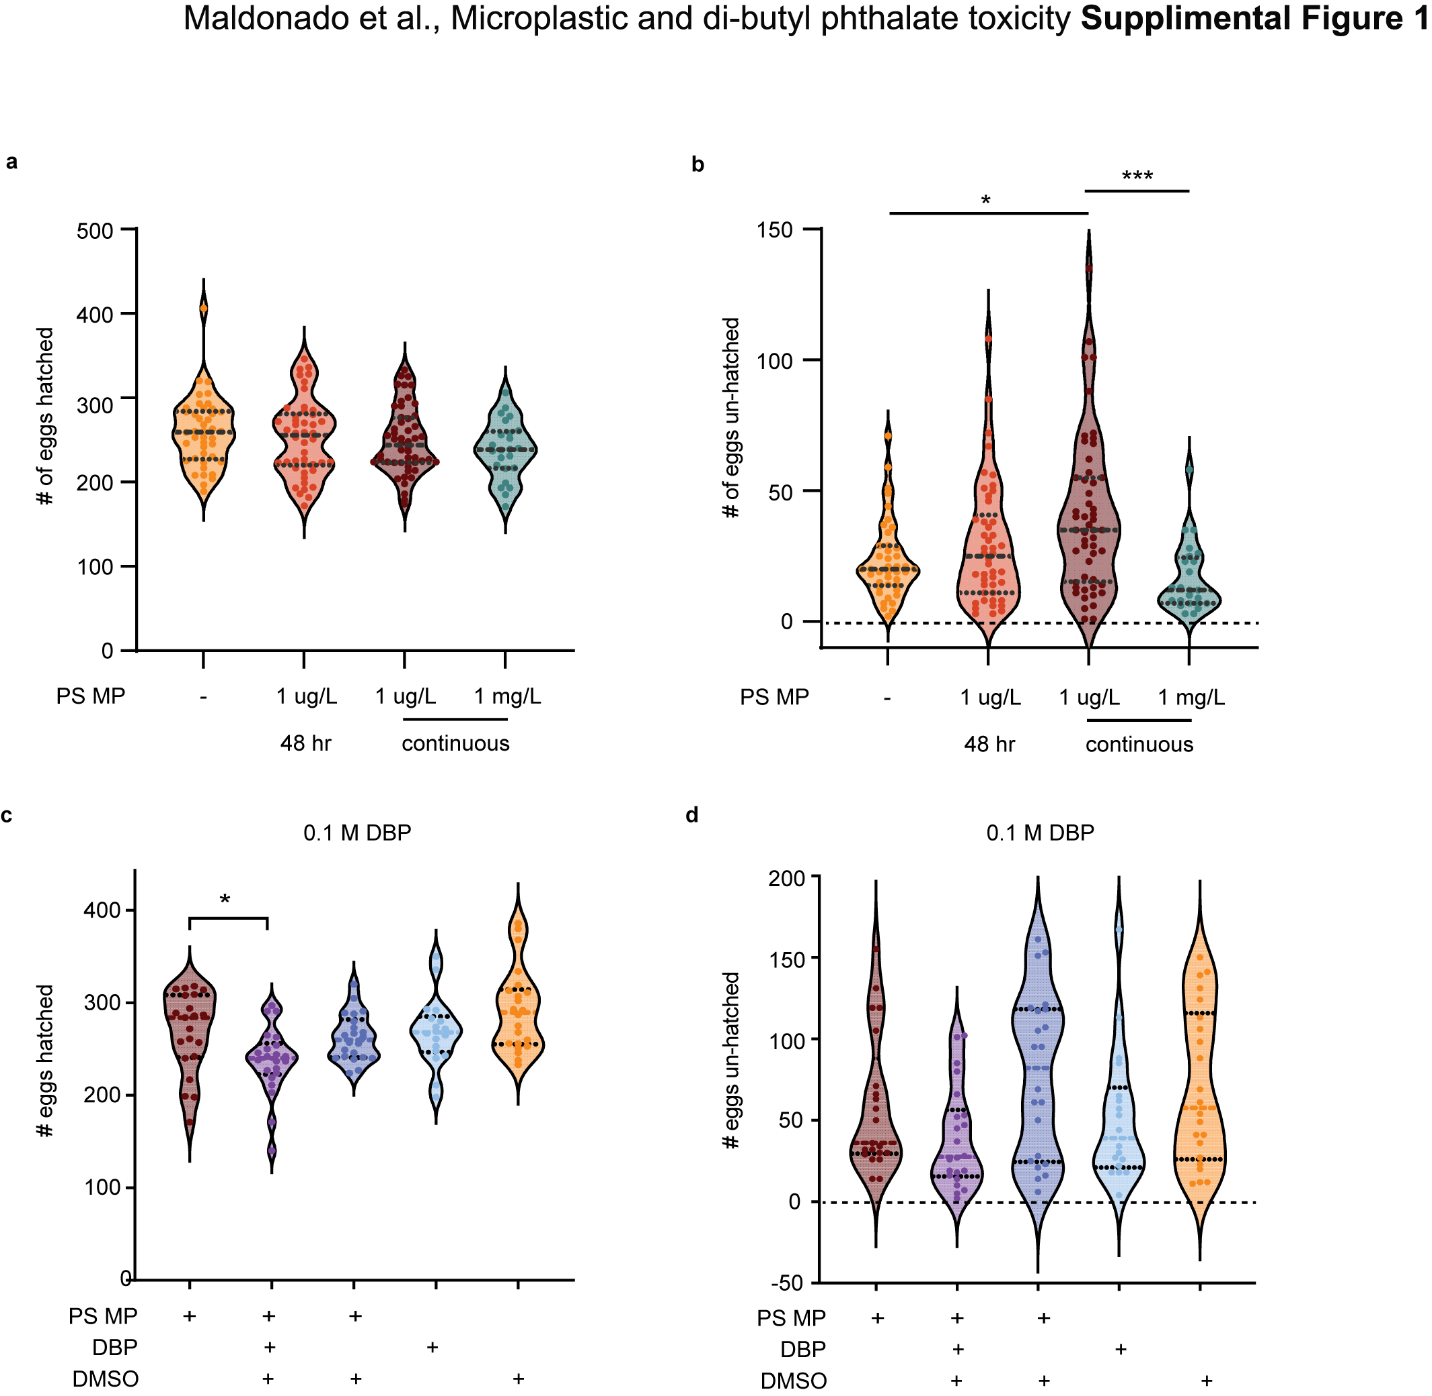


**Supplemental Figure 1:** Number of eggs hatched and unhatched in *C. elegans* exposed to 48 hours or continuouspolystyrene (PS) microplastic (MPs) with and without DBP. a) Number of eggs hatched with exposure to *E. coli* OP50 only, 48-hour exposure to PS MP, or continuous PS MP exposure. N=8, n=43, 46, 52. b) Number of eggs unhatched. c) Percent eggs hatched. d) Number of eggs hatched with exposure to continuous PS MP with and without 3.7 mM DBP. N= 4, n= 27, 28, 27, 28, 28. Violin plots show the mean with the standard deviation. Kruskal-Wallis was used for statistical analysis, using Dunn's as a post hoc test (*p ≤ 0.05; ***p ≤ 0.001).

**
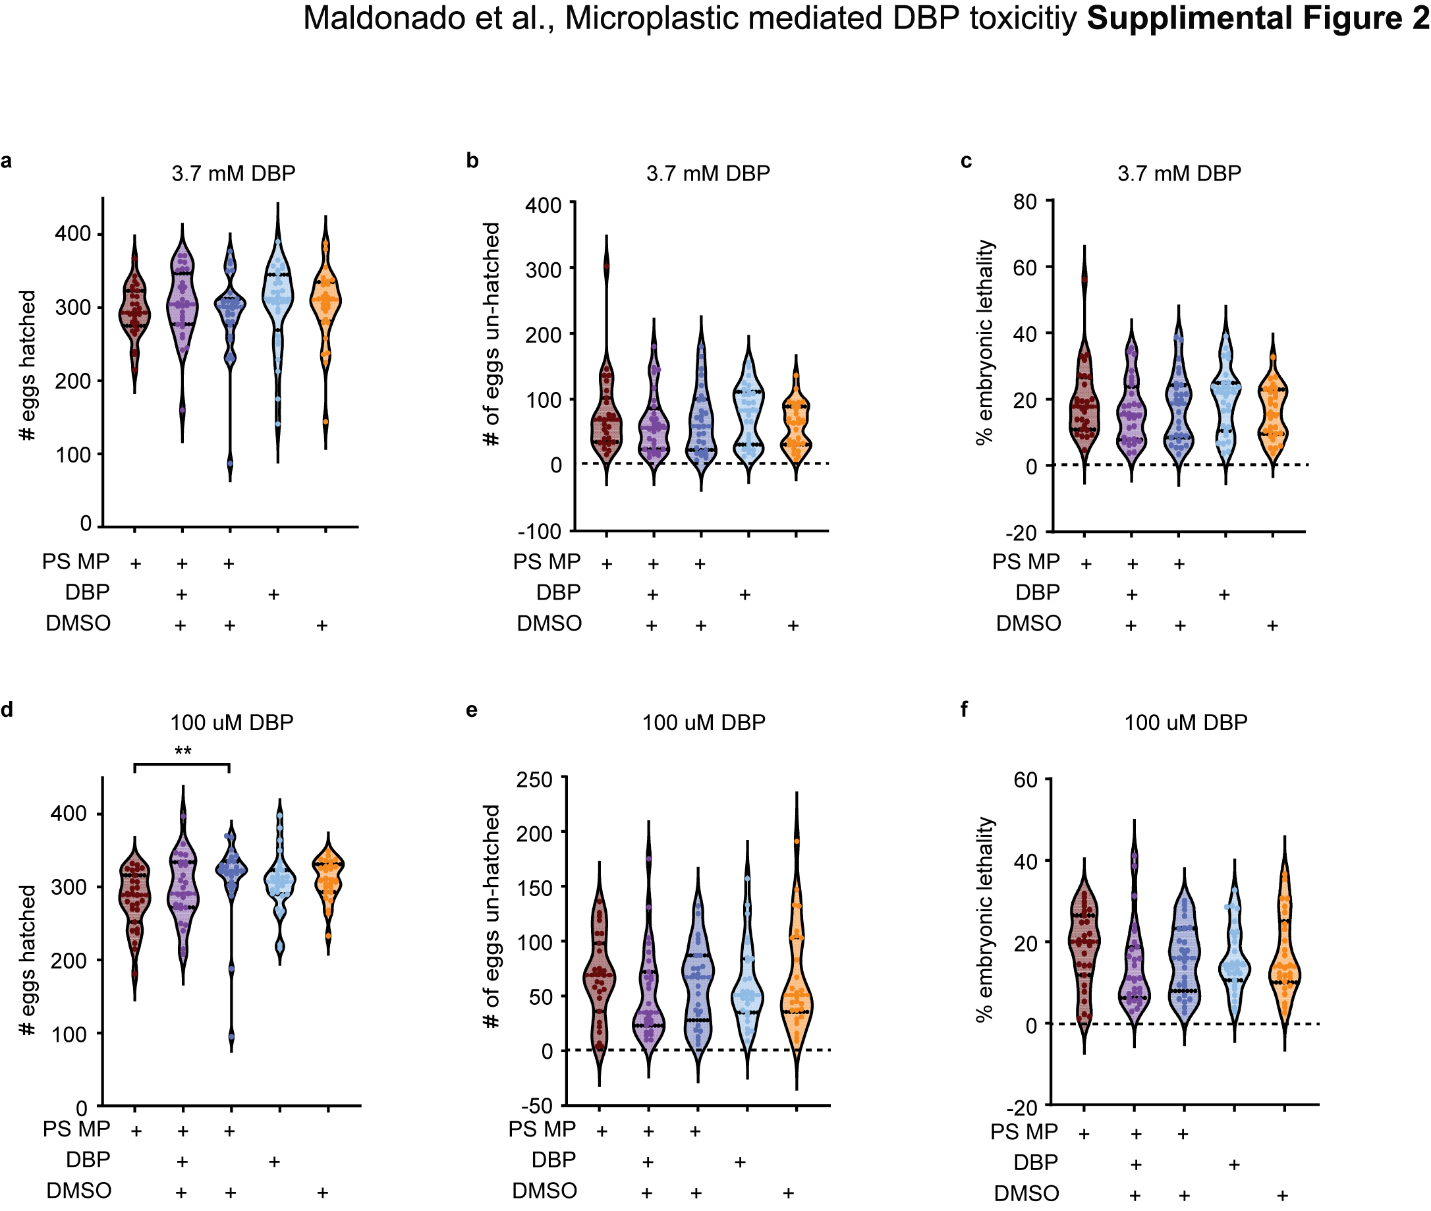
**

**Supplemental Figure 2:** Number of eggs hatched, unhatched eggs, and embryonic lethality of *C. elegans* exposed topolystyrene (PS) microplastic (MP) that had been soaked in different concentrations of DBP (3.7 mM or 100 µM). a-c) Nematode exposure to continuous PS MP with and without 3.7 mM DBP. N= 4, n= 27, 28, 27, 28, 28. a) Number of eggs hatched, b) Number of eggs unhatched, c) Percent embryonic lethality. d-f) Nematode exposure to continuous PS MP with and without 100 µM DBP. N=3, n=27, 27, 25, 27, 26. d) Number of eggs hatched, e) Number of eggs unhatched, f) Percent embryonic lethality. Violin plots show the mean with the standard deviation. Kruskal-Wallis was used for statistical analysis, using Dunn's as a post hoc test, **p ≤ 0.01.


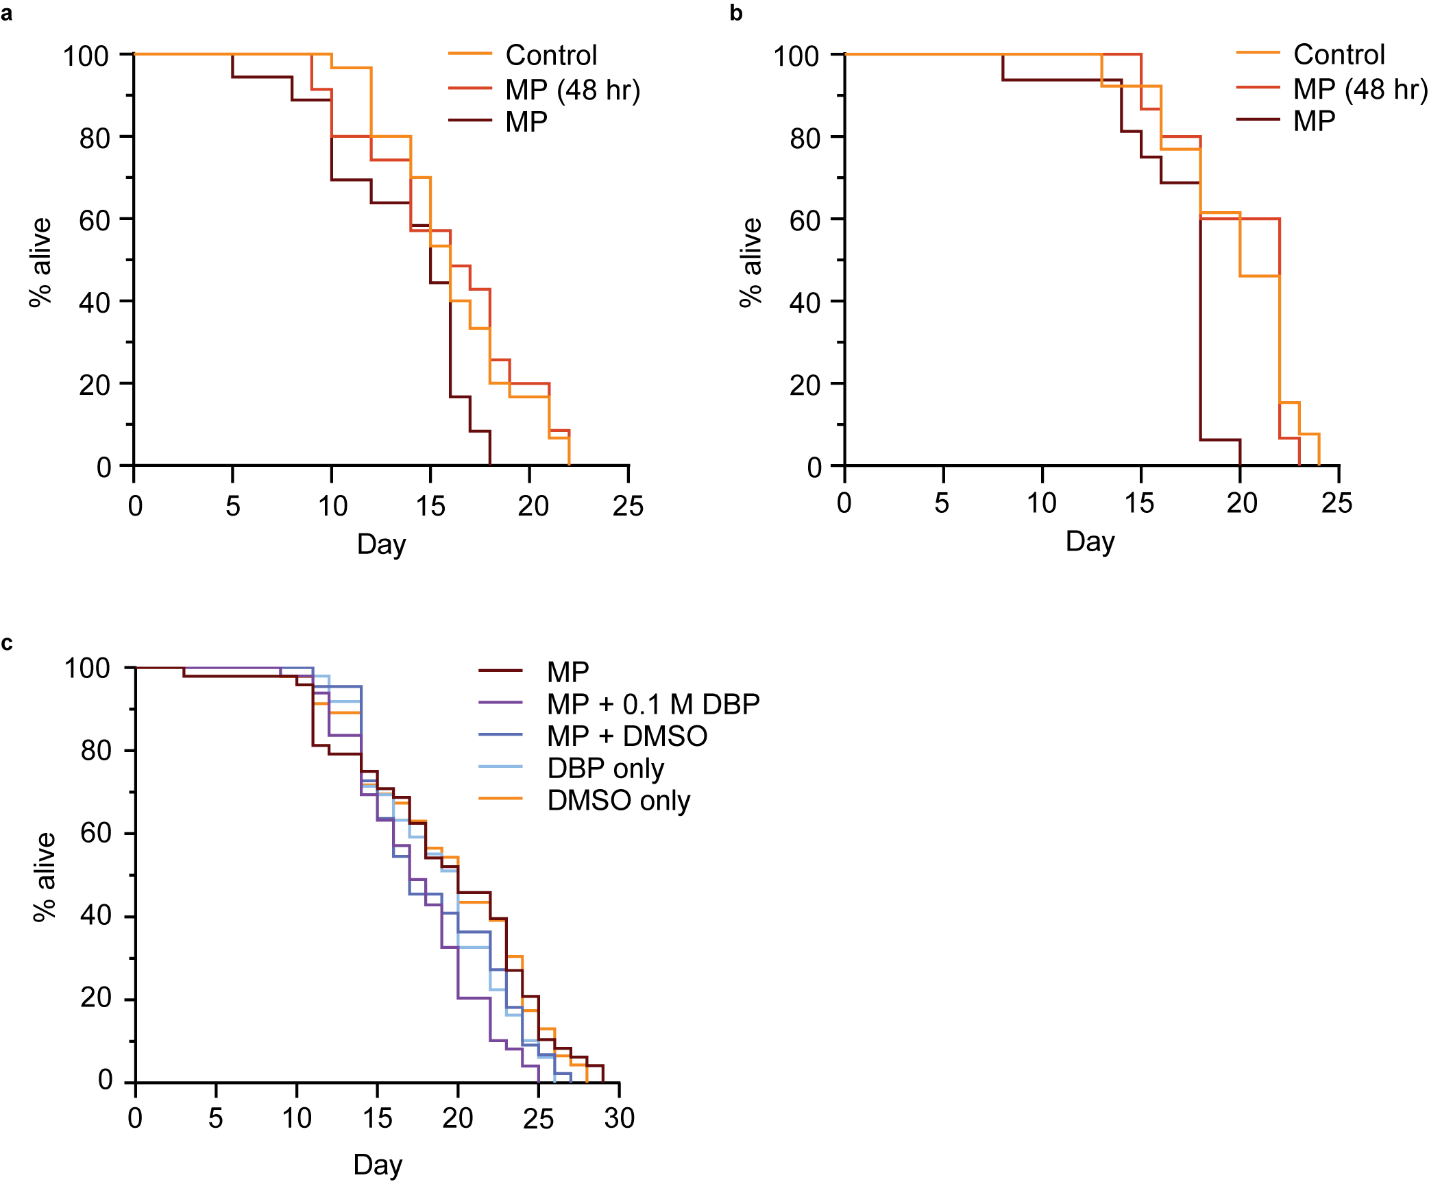


**Supplemental Figure 3:** Lifespan of *C. elegans* exposed topolystyrene (PS) microplastic (MP) and 0.1 M DBP. a) Survival assay for nematodes exposed to control (no MPs), 1 µg/L PS-MPs for 48 hours, or 1 µg/L PS-MPs continuously. n=30, 35, 36. p=0.0043. b) Same as a, n=20, 19, 23. p=0.0029.c) Survival assay for nematodes continuously exposed to 1 µg/L PS MPs, with and without being soaked in 100 µM DBP or vehicle alone (0.1 % DMSO) for 24 hours. n=48, 49, 44, 49, 46. p=0.0136. Log-rank (Mantel-Cox).
